# Supplementary material for: Alpha-1 Antitrypsin Reduces Disease Progression in a Mouse Model of Charcot-Marie-Tooth Type 1A: A Role for Decreased Inflammation and ADAM-17 Inhibition
Source: MDPI journal article supplement (doi:10.3390/ijms23137405), 2022-07-03
Supplement: s1 [file s1]

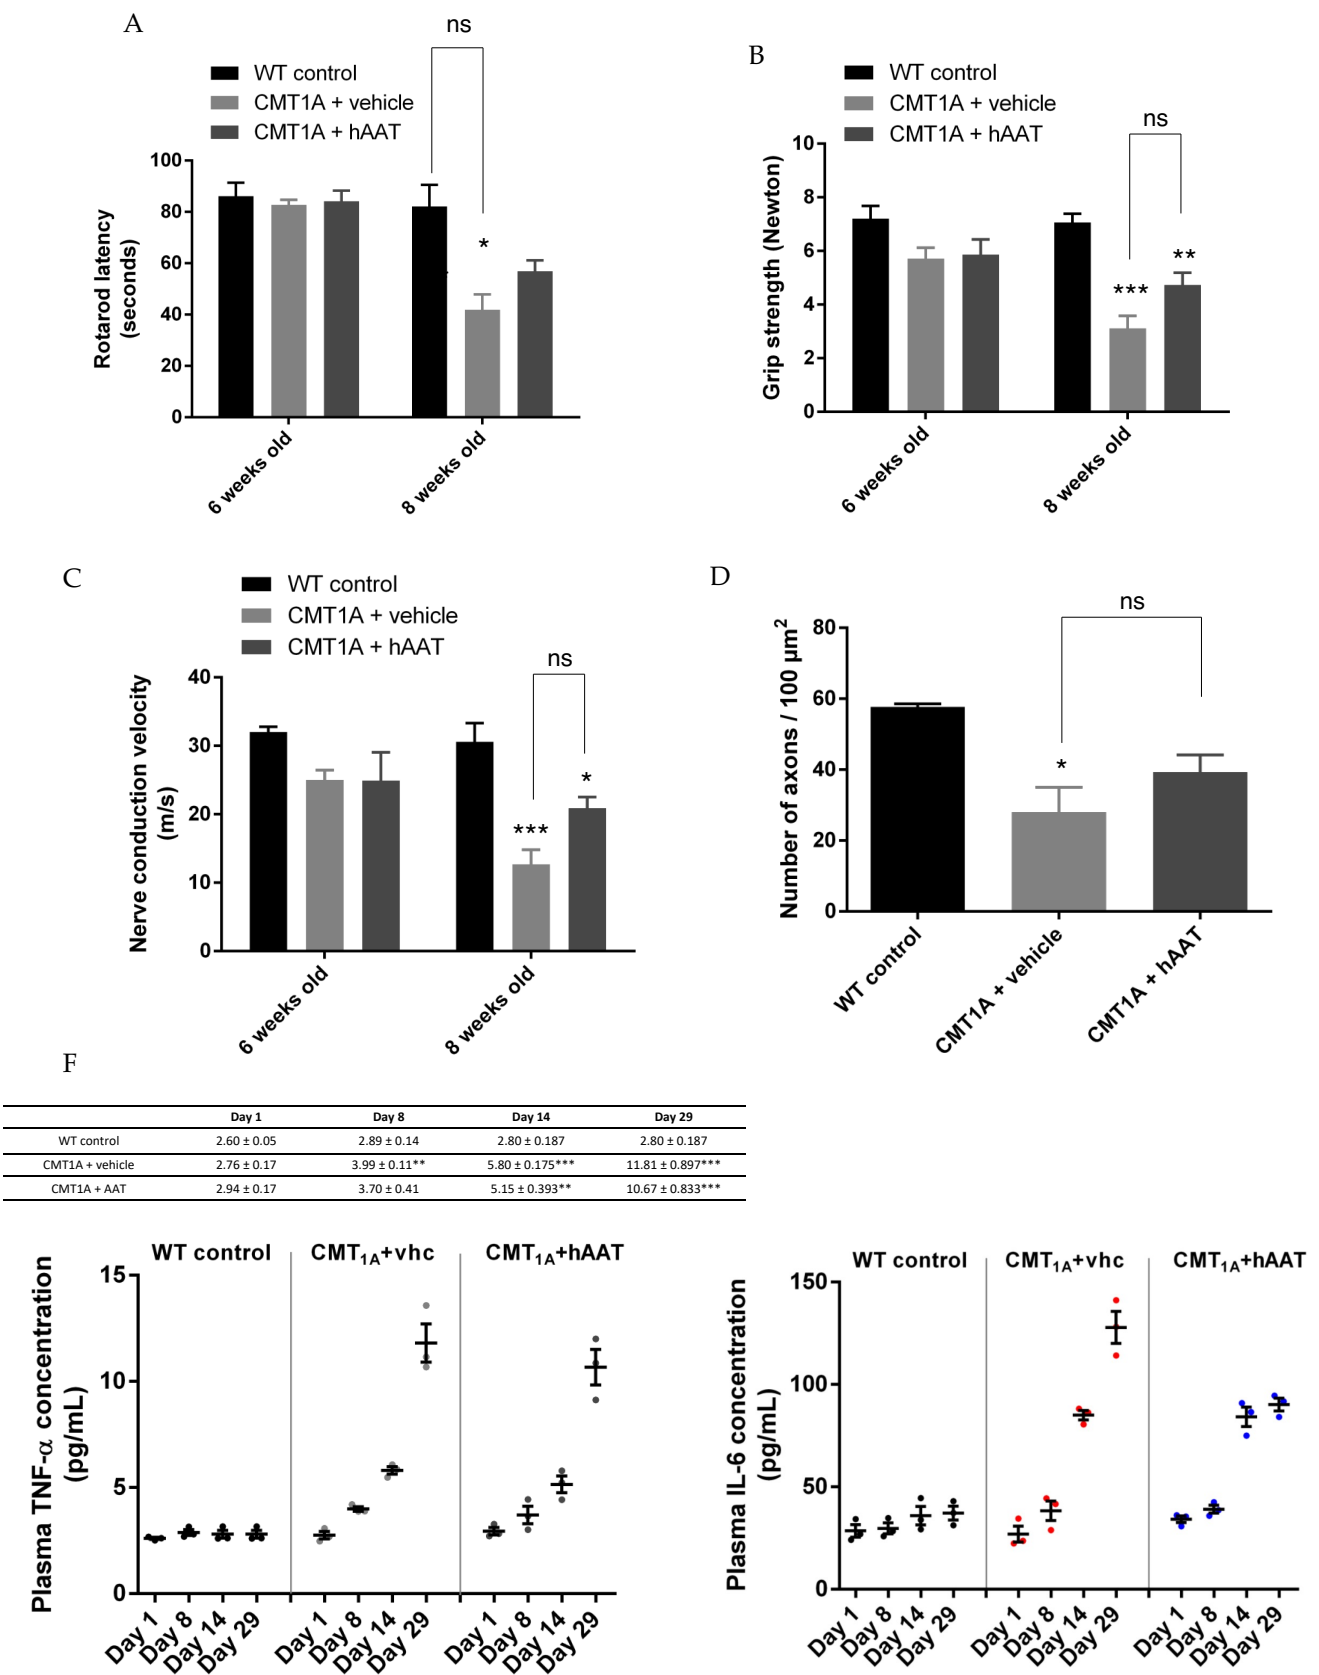

Figure S1. Rotarod Latency (A) Grip strength (B) At 8 weeks of age, CMT1A+ vehicle mice exhibited impaired neuromuscular performance relative to the wild type animals. CMT1A+hAAT mice presented a positive but not significant tendency in both neuromuscular test compared to CMT1A+vehicle. Nerve Conduction velocity (C) positive but not significant trend was observed in CMT1A mice treated with hAAT for this electric measurement. Number of axons (D) Slight increase of the total number of axons per surface was observed in the CMT+hAAT compared to CMT1A+vehicle. (F) Plasma TNF- $\alpha$  and IL-6 ELISA measurements. Mean  $\pm$  SEM, n=3 per group; 2-way ANOVA with repeated measures and Bonferroni t-test \*, \*\*,\*\*\*: p<0.05; p<0.01; p<0.001 vs WT control. WT: wild type, not significative (ns) vs CMT1A+vehicle. For TNF- $\alpha$  and IL-6 concentration Mean  $\pm$  SEM, Student t-test \*, \*\*, \*\*\*: p<0.05; p<0.01; p<0.001 vs WT control at this timepoint. For IL-6 concentration value see also Table 3 in the main text. For all the experiments n=3 mice per group.

B

## Hallmark pathway Enrichment Score from GSEA

A

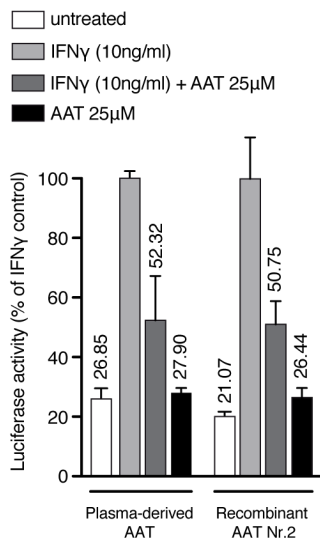

***IFN $\gamma$  response***  
***IFN $\alpha$  response***  
 Allograft rejection  
***TNF $\alpha$  signaling via NF $\kappa$ B***  
***Inflammatory response***  
***IL-6 JAK/STAT3 signaling***  
***KRAS signaling***  
 Apoptosis  
 Unfolded protein response  
***P53 pathway***  
 Complement  
 IL-2 STAT5 signaling  
 Mitotic spindle  
 Hypoxia  
 Xenobiotic metabolism  
 Protein secretion  
 Peroxisome  
 Epithelial mesenchymal transition  
 Bile acid metabolism  
 MTORC1 signaling  
 Oestrogen response late  
 Adipogenesis  
 Androgen response  
 Apical surface  
 Oxydative phosphorylation  
 Myogenesis  
 Glycolysis  
 Fatty acid metabolism  
 Apical junction  
 Cholesterol homeostasis

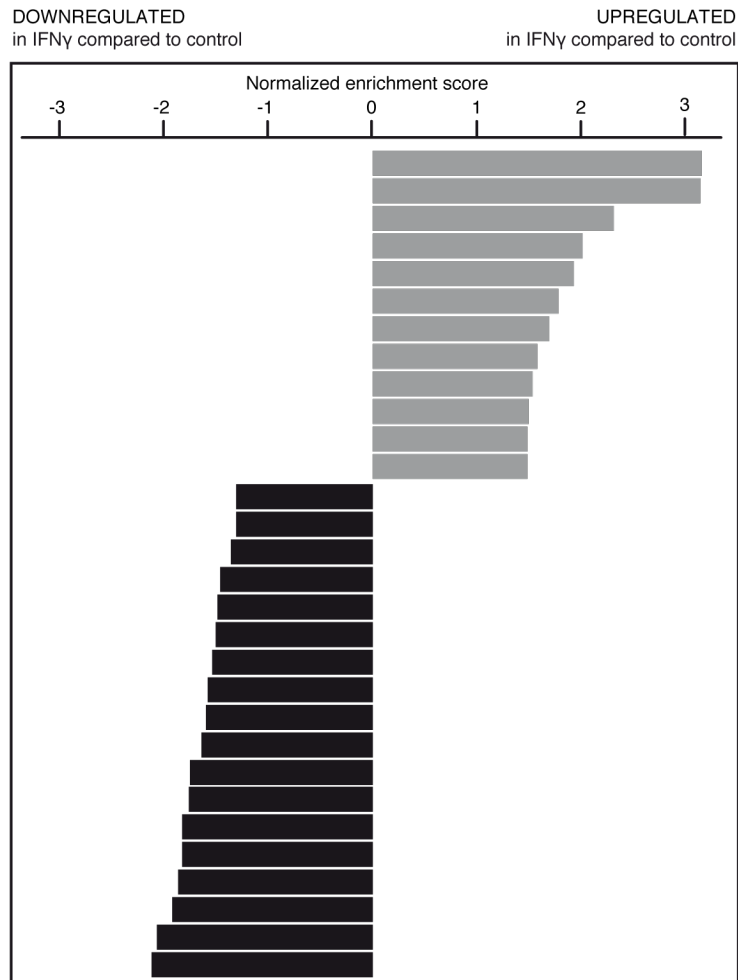

DOWNREGULATED in AAT compared to control

UPREGULATED in AAT compared to control

Protein secretion  
 Myc targets V1  
 Androgen response  
 UV response  
 MTORC1 signaling  
 E2F targets  
 G2M check points  
***TNF $\alpha$  signaling via NF $\kappa$ B***  
***Inflammatory response***  
 Myogenesis  
***IL-6 JAK/STAT3 signaling***  
***KRAS signaling***  
***IFN $\gamma$  response***  
***IFN $\alpha$  response***

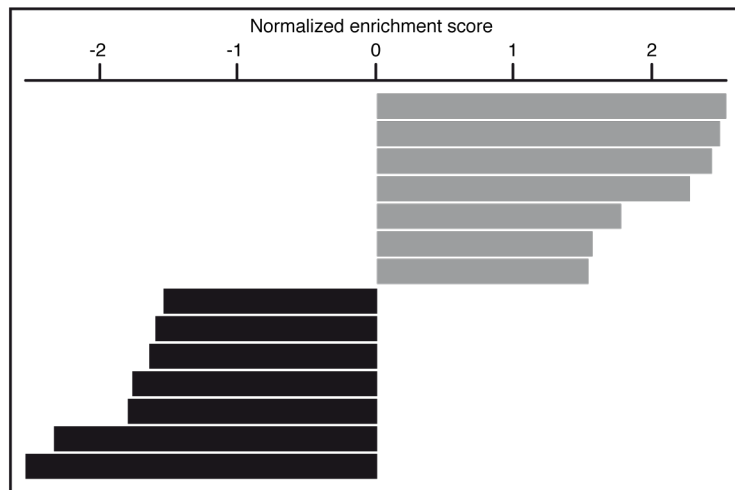

Figure S2. MHCII luciferase activation after IFN $\gamma$  induction followed by plasma hAAT and recombinant AAT (rhAAT) (A). Luciferase activity is normalized over cell viability. Bars represented percentage of control for all conditions. Gene Set Enrichment Analysis (GSEA) of RNAseq data from plasma and rhAAT treated cells (B). Upregulated gene families (grey bars) and downregulated ones (black bars) are shown according to normalized enrichment score. The inflammatory profile induced by IFN $\gamma$  was confirmed by the upregulation of several processes related to inflammation (bold italic), AAT in absence or presence (see Figure 9) of inflammation was able to downregulate some of these pathways (bold italic).

A

## MDSplot

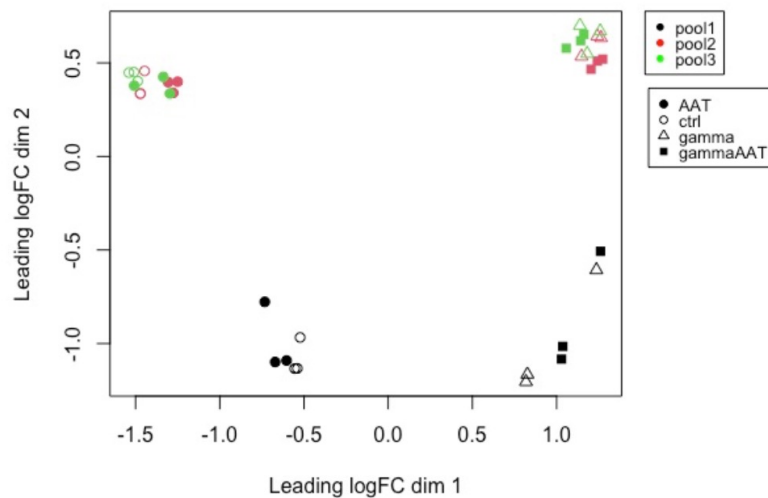

B

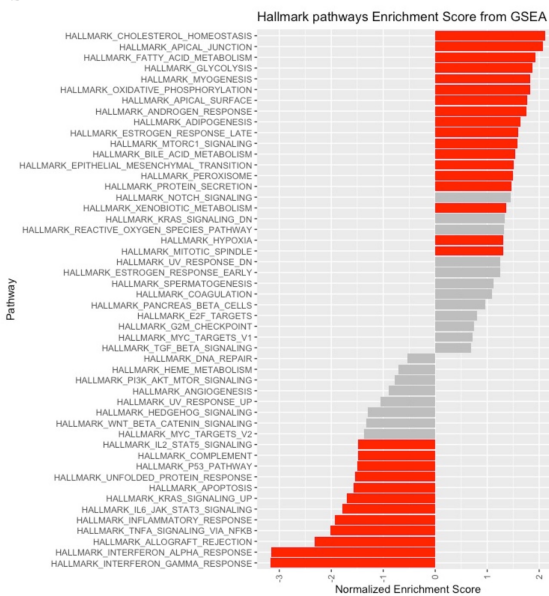

C

Enriched molecular signatures: gamma versus gammaAAT (pool2 and pool3)

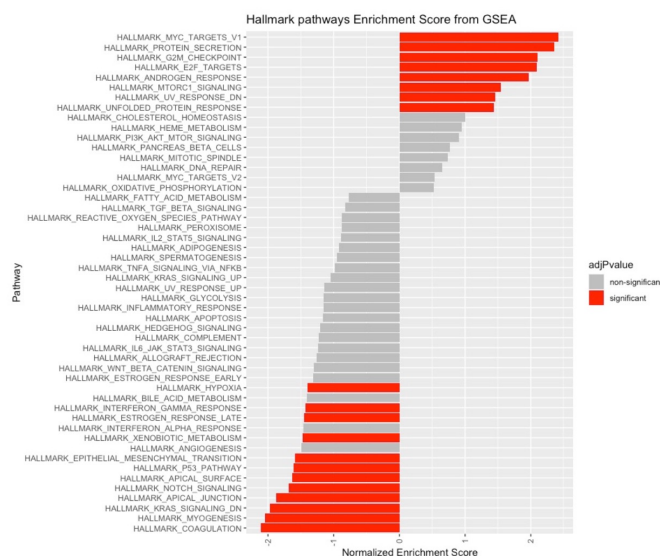

Enriched molecular signatures: control versus AAT (pool2 and pool3)

D

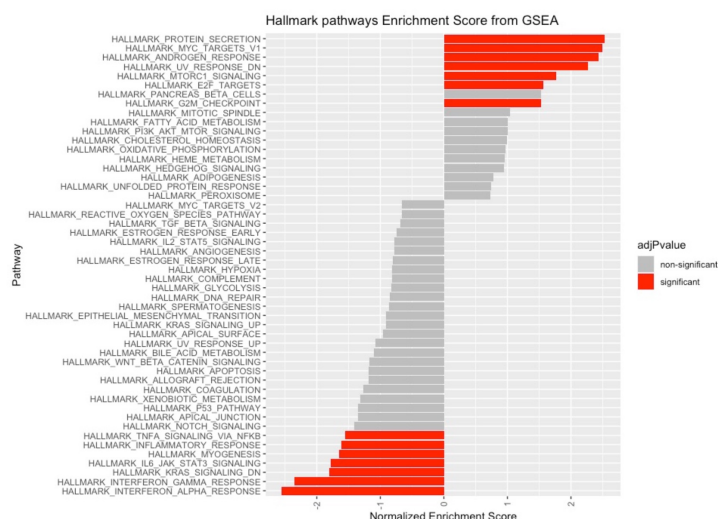

Figure S3. The MDS plot (multi-dimensional scaling) of the samples is shown (A). The MDS plot gives an indication of the similarity, based on the fold changes between all the pairs of samples. Enriched molecular signatures: control versus gamma (pool2 and pool3) (B). Enriched molecular signatures: control versus AAT (pool2 and pool3) (C). Enriched molecular signatures: gamma (IFN $\gamma$ ) versus gammaAAT (IFN $\gamma$  + AAT) (pool2 and pool3) (D). A negative score (NES) means that the genes belonging to that gene set are mostly down regulated in the comparison tested and a positive NES that they are upregulated in the tested comparison.

### Antigen presentation

| Top Gene       | p-value                   | FC                  | p-value                    | FC                  |
|----------------|---------------------------|---------------------|----------------------------|---------------------|
|                | Up in inflammation        |                     | DOWN<br>(Inflammation+AAT) |                     |
| CD74           | 4.15E-14                  | 75.81               |                            |                     |
| LAMP3          | 9.39E-12                  | 7.94                |                            |                     |
| TAP1           | 5.99E-11                  | 6.12                |                            |                     |
| <b>PSMB9</b>   | <b><u>5.73E-11</u></b>    | <b><u>5.96</u></b>  | <b><u>3.11E-02</u></b>     | <b><u>-1.23</u></b> |
| <b>HLA-DOB</b> | <b><u>5.11E-04</u></b>    | <b><u>4.48</u></b>  | <b><u>6.82E-03</u></b>     | <b><u>-4.49</u></b> |
| PSMB8          | 5.18E-11                  | 4.22                |                            |                     |
| <i>HLA-DRA</i> | <b><i>4.99E-10</i></b>    | <b><i>4.76</i></b>  | <b><i>4.68E-02</i></b>     | <b><i>-2.22</i></b> |
| SOCS1          | 1.21E-05                  | 3.99                |                            |                     |
| TAP2           | 8.97E-13                  | 3.54                |                            |                     |
| NCF2           | 2.57E-05                  | 2.88                |                            |                     |
| CTSS           | 2.29E-05                  | 3.71                |                            |                     |
| HLA-DPA1       | 8.31E-09                  | 3.22                |                            |                     |
| BATF3          | 1.45E-06                  | 2.55                |                            |                     |
| NFKB1          | 6.21E-10                  | 2.41                |                            |                     |
| <b>IL1B</b>    | <b><u>5.54E-04</u></b>    | <b><u>2.08</u></b>  | <b><u>1.11E-03</u></b>     | <b><u>-2.07</u></b> |
| FYN            | 2.18E-07                  | 1.80                |                            |                     |
| BCL10          | 3.21E-05                  | 1.65                |                            |                     |
| MALT1          | 1.75E-04                  | 1.62                |                            |                     |
|                | DOWN in inflammation      |                     | UP in inflammation+AAT     |                     |
| TUBA1A         | 2.29E-12                  | -5.00               |                            |                     |
| KIF20A         | 7.29E-12                  | -3.75               |                            |                     |
| <b>CALR</b>    | <b><u>6.15E-11</u></b>    | <b><u>-3.53</u></b> | <b><u>4.74E-04</u></b>     | <b><u>1.35</u></b>  |
| <b>PYCARD</b>  | <b><u>6.92E-03</u></b>    | <b><u>-2.86</u></b> | <b><u>1.53E-02</u></b>     | <b><u>2.20</u></b>  |
| CDC20          | 1.05E-08                  | -2.80               |                            |                     |
| Other Gene     | p-value                   | FC                  | p-value                    | FC                  |
|                | Down in inflammation      |                     | UP in inflammation+AAT     |                     |
| NFATC2         | <0.05                     | -1.37               | <0.05                      | 1.63                |
| MRC2           | <0.05                     | -1.61               | <0.05                      | 1.47                |
| CTSD           | <0.05                     | -1.34               | <0.05                      | 1.47                |
| HLA-DPB1       | <0.05                     | -1.23               | <0.05                      | 1.31                |
| TAPBP          | <0.05                     | -1.90               | <0.05                      | 1.23                |
| SOCS3          | <0.05                     | -1.99               | <0.05                      | 1.20                |
| CTSA           | <0.05                     | -1.31               | <0.05                      | 1.17                |
|                | Regulated in inflammation |                     | Regulated in AAT           |                     |
| NFATC1         | <0.05                     | -1.29               | <0.05                      | 1.44                |
| TRAF6          | <0.05                     | 1.08                | <0.05                      | -1.26               |

Figure S4. Gene related to antigen presentation. Inflammatory top gene (FC>2; p-value<0.05; left column), were defined by differential expression between untreated and IFN $\gamma$ -treated cells (inflammation; middle column). Top genes that were significantly and oppositely regulated by AAT treatment are highlighted (right column; underline).

| Cytokine signaling |                      |               |                          |              |
|--------------------|----------------------|---------------|--------------------------|--------------|
| Top Gene           | p-value              | FC            | p-value                  | FC           |
|                    | UP in inflammation   |               | DOWN in inflammation+AAT |              |
| IL6                | 3.53E-10             | 17.139        |                          |              |
| TNFSF10            | 2.53E-07             | 10.595        |                          |              |
| TRAF1              | 4.39E-07             | 7.789         |                          |              |
| CCL5               | 5.17E-09             | 7.540         |                          |              |
| <u>ATF3</u>        | <u>6.86E-13</u>      | <u>7.218</u>  | <u>1.85E-03</u>          | <u>-1.26</u> |
| <u>PSMB9</u>       | <u>6.09E-10</u>      | <u>5.963</u>  | <u>3.11E-02</u>          | <u>-1.23</u> |
| CEBPB              | 2.57E-10             | 5.808         |                          |              |
| CSF1               | 3.52E-09             | 5.455         |                          |              |
| PSMB8              | 1.63E-10             | 4.219         |                          |              |
| IL23A              | 6.49E-03             | 4.218         |                          |              |
| STAT1              | 2.04E-09             | 4.110         |                          |              |
| IL15RA             | 4.63E-07             | 3.660         |                          |              |
| <u>FGF2</u>        | <u>1.66E-06</u>      | <u>3.608</u>  | <u>9.13E-03</u>          | <u>-1.57</u> |
| CXCL2              | 6.42E-05             | 3.467         |                          |              |
| IL21R              | 1.16E-05             | 3.235         |                          |              |
| CEBPG              | 3.19E-09             | 2.909         |                          |              |
| <u>CXCL1</u>       | <u>1.36E-04</u>      | <u>2.82</u>   | <u>7.22E-03</u>          | <u>-2.09</u> |
| CASP1              | 1.07E-05             | 2.740         |                          |              |
| <u>TNFRSF9</u>     | <u>2.39E-04</u>      | <u>2.434</u>  | <u>1.23E-03</u>          | <u>-2.35</u> |
| <u>CXCL5</u>       | <u>5.07E-05</u>      | <u>2.36</u>   | <u>5.98E-03</u>          | <u>-2.15</u> |
| <u>IL1B</u>        | <u>2.14E-03</u>      | <u>2.08</u>   | <u>1.11E-03</u>          | <u>-2.07</u> |
|                    | DOWN in inflammation |               | UP in inflammation+AAT   |              |
| <u>FSCN1</u>       | <u>9.42E-08</u>      | <u>-6.312</u> | <u>8.09E-04</u>          | <u>1.48</u>  |
| CCL2               | 2.95E-03             | -6.086        |                          |              |
| <u>IL4I1</u>       | <u>3.22E-03</u>      | <u>-4.19</u>  | <u>3.22E-03</u>          | <u>1.95</u>  |
| <u>IL27RA</u>      | <u>2.22E-07</u>      | <u>-3.848</u> | <u>2.67E-02</u>          | <u>1.36</u>  |
| <u>STAT5A</u>      | <u>7.66E-04</u>      | <u>-3.53</u>  | <u>9.78E-03</u>          | <u>1.45</u>  |
| CEBPD              | 5.07E-05             | -3.102        |                          |              |
| EGF                | 6.13E-03             | -2.973        |                          |              |
| FGF18              | 2.11E-05             | -2.754        |                          |              |
| IL6R               | 6.00E-08             | -2.630        |                          |              |
| <u>IL1R1</u>       | <u>1.27E-07</u>      | <u>-2.566</u> | <u>3.94E-02</u>          | <u>1.18</u>  |
| <u>IAK3</u>        | <u>3.03E-08</u>      | <u>-2.43</u>  | <u>3.20E-03</u>          | <u>1.43</u>  |
| <u>RASAL1</u>      | <u>1.36E-06</u>      | <u>-2.34</u>  | <u>4.65E-03</u>          | <u>1.52</u>  |
| Other Gene         | p-value              | FC            | p-value                  | FC           |
|                    | UP in inflammation   |               | DOWN in inflammation+AAT |              |
| IL18               | <0.05                | 1.83          | <0.05                    | -1.75        |
| NFKBIZ             | <0.05                | 1.94          | <0.05                    | -1.37        |
| ANXA1              | <0.05                | 1.17          | <0.05                    | -1.33        |
| HBEGF              | <0.05                | 1.36          | <0.05                    | -1.30        |
| DUSP6              | <0.05                | 1.96          | <0.05                    | -1.26        |
|                    | DOWN in inflammation |               | UP in inflammation+AAT   |              |
| CX3CL1             | <0.05                | -1.38         | <0.05                    | 1.61         |
| MAP2K2             | <0.05                | -1.28         | <0.05                    | 1.51         |

Figure S5. Genes related to cytokines signaling. Analysis was performed as described in Figure S4.
